# Supplementary material for: Deep Learning Approaches to Osteosarcoma Diagnosis and Classification: A Comparative Methodological Approach
Source: MDPI journal article supplement (doi:10.3390/cancers15082290), 2023-04-13
Supplement: s1 [file s1]

# Deep Learning Approaches to Osteosarcoma Diagnosis and Classification: A Comparative Methodological Approach

Ioannis A. Vezakis <sup>1</sup>, George I. Lambrou <sup>1,2,3</sup> and George K. Matsopoulos <sup>1,\*</sup>

<sup>1</sup> Biomedical Engineering Laboratory, School of Electrical Engineering, National Technical University of Athens, Athens, Greece

<sup>2</sup> Choremeio Research Laboratory, First Department of Pediatrics, National and Kapodistrian University of Athens, Thivon & Levadeias 8, 11527 Athens, Greece

<sup>3</sup> University Research Institute of Maternal and Child Health & Precision Medicine, National and Kapodistrian University of Athens, Thivon & Levadeias 8, 11527 Athens, Greece

\* Correspondence: G.K.M. gmatsopoulos@biomed.ntua.gr

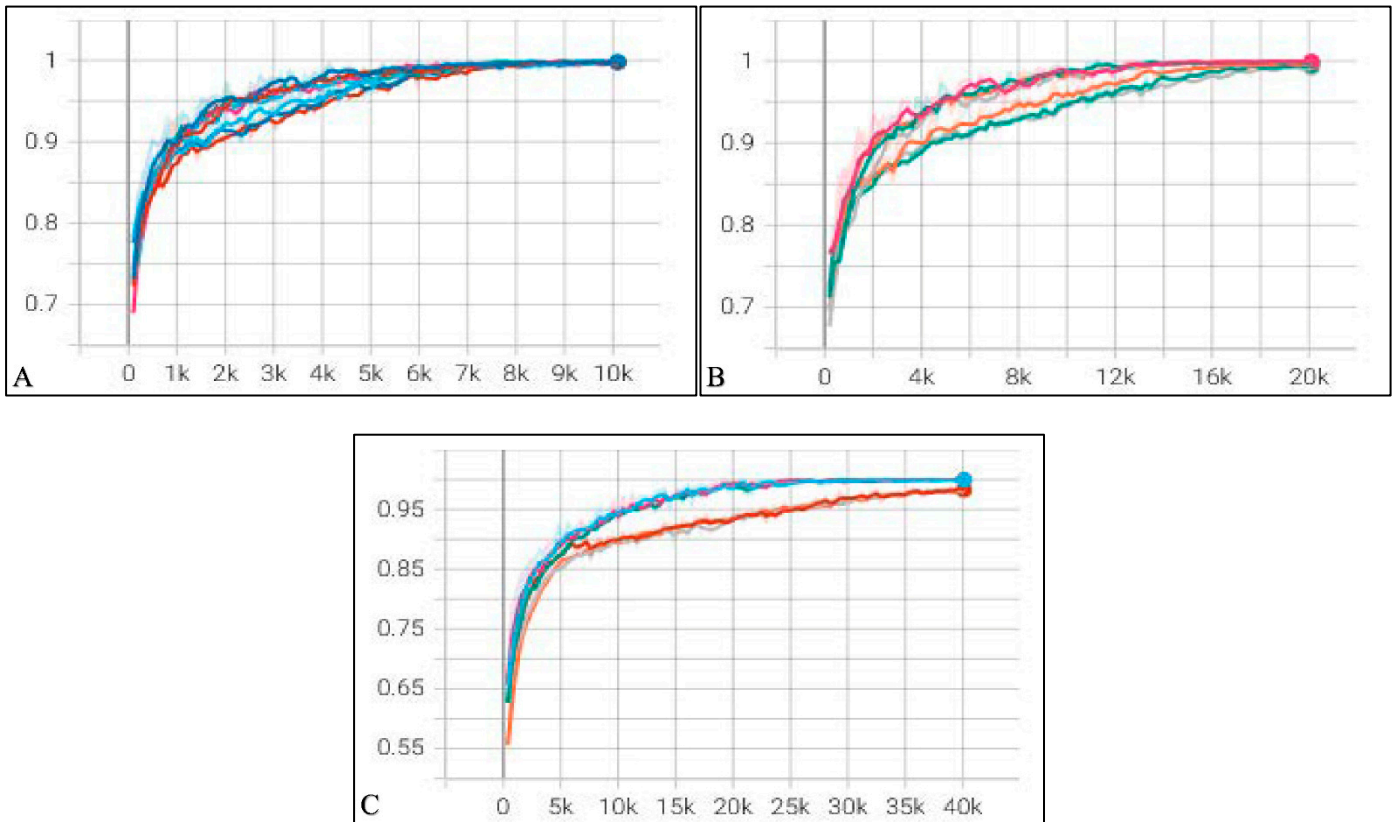

**Figure S1.** The overall training accuracies, plotted over 100 epochs, superimposed for all networks with input image size: **A)** 256x256; **B)** 512x512; **C)** 1024x1024. In all cases, the training accuracy tends to approach a perfect score. VGG networks have been excluded as they failed to learn in our experiments.
