# Supplementary material for: Deep Learning Approaches to Osteosarcoma Diagnosis and Classification: A Comparative Methodological Approach
Source: MDPI journal article supplement (doi:10.3390/cancers15082290), 2023-04-13
Supplement: s1 [file s1]

# Deep Learning Approaches to Osteosarcoma Diagnosis and Classification: A Comparative Methodological Approach

Ioannis A. Vezakis <sup>1</sup>, George I. Lambrou <sup>1,2,3</sup> and George K. Matsopoulos <sup>1,\*</sup>

<sup>1</sup> Biomedical Engineering Laboratory, School of Electrical Engineering, National Technical University of Athens, Athens, Greece

<sup>2</sup> Choremeio Research Laboratory, First Department of Pediatrics, National and Kapodistrian University of Athens, Thivon & Levadeias 8, 11527 Athens, Greece

<sup>3</sup> University Research Institute of Maternal and Child Health & Precision Medicine, National and Kapodistrian University of Athens, Thivon & Levadeias 8, 11527 Athens, Greece

\* Correspondence: gmatsopoulos@biomed.ntua.gr

“Macro-averaging reduces the multiclass predictions down to multiple sets of binary predictions, calculates the corresponding metric for each of the binary cases, and then averages the results together” (<https://cran.r-project.org/web/packages/yardstick/vignettes/multiclass.html>, accessed March 8<sup>th</sup>, 2023).

As our investigation concerned a multiclass case (i.e. normal tissue, tumors (osteosarcoma) and necrotic tissue) we have selected *F1* macro-averaging in order to reduce the problem to “multiple one-vs-all comparisons”. Macro-averaging is performed using the following equation:

$$F1_{Macro} = \frac{F1_1 + F1_2 + \dots + F1_k}{k} = F1_1 \frac{1}{k} + F1_2 \frac{1}{k} + \dots + F1_k \frac{1}{k} \quad (1)$$

In macro averaging, all classes obtain an equal weight, when contributing their portion of the precision value to the total.

**Supplementary Table S1.** *F1* scores for each network and image size.

| Network 1      | Image Size | F1 Score  |              |          | Macro-Averaged F1 Score |
|----------------|------------|-----------|--------------|----------|-------------------------|
|                |            | Non-Tumor | Viable Tumor | Necrosis |                         |
| MobileNetV2    | 256×256    | 0.94      | 0.89         | 0.85     | 0.893                   |
| EfficientNetB0 | 256×256    | 0.95      | 0.87         | 0.85     | 0.890                   |
| EfficientNetB3 | 1024×1024  | 0.94      | 0.89         | 0.84     | 0.890                   |
| ResNet34       | 512×512    | 0.93      | 0.92         | 0.82     | 0.890                   |
| EfficientNetB0 | 1024×1024  | 0.93      | 0.89         | 0.84     | 0.887                   |
| EfficientNetB7 | 512×512    | 0.94      | 0.88         | 0.84     | 0.887                   |
| ResNet34       | 256×256    | 0.92      | 0.92         | 0.82     | 0.887                   |
| EfficientNetB1 | 256×256    | 0.95      | 0.86         | 0.84     | 0.883                   |
| EfficientNetB7 | 256×256    | 0.95      | 0.87         | 0.83     | 0.883                   |
| ResNet50       | 256×256    | 0.94      | 0.89         | 0.82     | 0.883                   |
| EfficientNetB0 | 512×512    | 0.93      | 0.88         | 0.83     | 0.880                   |
| EfficientNetB1 | 512×512    | 0.94      | 0.88         | 0.82     | 0.880                   |
| VGG16          | 256×256    | 0.93      | 0.89         | 0.81     | 0.877                   |
| EfficientNetB5 | 896×896    | 0.92      | 0.89         | 0.81     | 0.873                   |
| EfficientNetB5 | 512×512    | 0.93      | 0.87         | 0.82     | 0.873                   |
| ResNet50       | 512×512    | 0.92      | 0.88         | 0.82     | 0.873                   |
| EfficientNetB3 | 256×256    | 0.93      | 0.87         | 0.81     | 0.870                   |
| ResNet18       | 256×256    | 0.92      | 0.88         | 0.81     | 0.870                   |
| EfficientNetB1 | 1024×1024  | 0.93      | 0.85         | 0.82     | 0.867                   |
| EfficientNetB3 | 512×512    | 0.93      | 0.86         | 0.81     | 0.867                   |
| EfficientNetB5 | 256×256    | 0.94      | 0.84         | 0.80     | 0.860                   |
| MobileNetV2    | 512×512    | 0.92      | 0.85         | 0.81     | 0.860                   |
| ResNet50       | 896×896    | 0.90      | 0.89         | 0.77     | 0.853                   |

|             |           |      |      |      |       |
|-------------|-----------|------|------|------|-------|
| ResNet18    | 512×512   | 0.92 | 0.85 | 0.78 | 0.850 |
| ViT-B/16    | 224×224   | 0.88 | 0.83 | 0.72 | 0.810 |
| ResNet18    | 1024×1024 | 0.83 | 0.86 | 0.72 | 0.803 |
| ResNet34    | 1024×1024 | 0.82 | 0.87 | 0.70 | 0.797 |
| MobileNetV2 | 1024×1024 | 0.82 | 0.84 | 0.66 | 0.773 |
| VGG16       | 1024×1024 | 0.63 | -    | -    | 0.630 |
| VGG16       | 512×512   | 0.63 | -    | -    | 0.630 |
| VGG19       | 896×896   | 0.63 | -    | -    | 0.630 |
| VGG19       | 512×512   | 0.63 | -    | -    | 0.630 |
| VGG19       | 256×256   | 0.63 | -    | -    | 0.630 |

---
